# Supplementary material for: Toward low-sensitive and high-energetic cocrystal III: thermodynamics of energetic–energetic cocrystal formation
Source: Royal Society of Chemistry journal article supplement (doi:10.1039/c5ce02009c), 2015-01-01
Supplement: c5ce02009c1.pdf [file c5ce02009c1.pdf]

## **Toward Low-sensitive and High-energetic Cocrystal III: Thermodynamics of the Energetic-energetic Cocrystal Formation**

Xianfeng Wei,<sup>a</sup> Anbang Zhang,<sup>ab</sup> Yu Ma,<sup>a</sup> Xianggui Xue,<sup>a</sup> Yuanqiang Zhu,<sup>b</sup> and Chaoyang Zhang<sup>a\*</sup>

<sup>a</sup>*Institute of Chemical Materials, China Academy of Engineering Physics (CAEP), P. O. Box 919-327, Mianyang, Sichuan 621900, China.*

<sup>b</sup>*College of Chemistry and Chemical Engineering, Southwest Petroleum University, Chengdu, Sichuan 610500, China.*

### **Supporting Information**

#### **Table of Contents**

- S1. Geometries of hydrogen bonds in  $\beta$ -CL-20 and CL-20-based EECCs.
- S2. Geometries of O...O contacts in BTF and BTF-based EECCs.
- S3. Summary of synthesis conditions of observed EECCs.

## S1. Geometries of hydrogen bonds in $\beta$ -CL-20 and CL-20-based EECCs.

**Table s1.** Summary of intermolecular hydrogen bonding interactions ( $A-H\cdots B$ ; Å, °) operating in the crystal structures of CL-20 polymorphs and co-crystals regarding a CL-20 molecule involved in crystal. The distance of  $H\cdots B$  and the angle of  $A-H\cdots B$  are limited to shorter than 2.6 Å and bigger than 120°.

|                | A         | H   | B   | A-H   | H $\cdots$ B | A $\cdots$ B | A-H $\cdots$ B | Symmetry operation                                                |
|----------------|-----------|-----|-----|-------|--------------|--------------|----------------|-------------------------------------------------------------------|
| $\beta$ -CL-20 | C4        | H4  | O4  | 0.933 | 2.542        | 3.272        | 135.4          | 1-x,1/2+y,1-z; 1-x,-1/2+y,1-z                                     |
|                | C5        | H5  | O5  | 0.852 | 2.576        | 3.233        | 134.8          | 1/2+x,y,1-z; -1/2+x,y,1-z                                         |
|                | C6        | H6  | O9  | 0.898 | 2.539        | 3.161        | 126.9          | -1/2+x,y,-z; 1/2+x,y,-z                                           |
| CL-20/HMX      | C4        | H4  | O3  | 1.000 | 2.584        | 3.327        | 131.1          | 1-x,-1/2+y,1/2-z; x,1/2-y,-1/2+z; x,1/2-y,-1/2+z; 1-x,1/2+y,1/2-z |
|                | C3        | H3  | O4  | 0.999 | 2.391        | 3.377        | 168.9          | 1-x,-1/2+y,1/2-z; x,1/2-y,-1/2+z; x,1.5-y,-1/2+z; 1-x,1/2+y,1/2-z |
|                | C7        | H7A | O7  | 0.990 | 2.288        | 3.140        | 143.6          | -x,1-y,-z; x,1+y,z; -x,1-y,-z; 1+x,y,z;                           |
|                | C7        | H7A | O9  | 0.990 | 2.311        | 2.967        | 122.9          | -x,1-y,-z; -x,2-y,-z; -x,1-y,-z; 1+x,y,z                          |
|                | C8        | H8B | O10 | 0.990 | 2.319        | 3.137        | 139.4          | -x,2-y,-z; 1-x,1-y,-z; x, y, z                                    |
|                | C8        | H8A | O7  | 0.991 | 2.421        | 3.335        | 153.1          | -x,1-y,-z; x,1+y,z; 1+x,y,z                                       |
|                | C2        | H2  | O16 | 0.999 | 2.357        | 3.259        | 149.6          | x,1.5-y,-1/2+z; 1-x,-1/2+y,1/2-z; -x,1/2+y,-1/2-z; x,1.5-y,1/2+z  |
|                | C7        | H7B | O15 | 0.991 | 2.515        | 3.433        | 154.0          | -x,1/2+y,1/2-z; -x,1/2+y,-1/2-z; x,1.5-y,1/2+z                    |
|                | CL-20/TNT | C13 | H11 | O13   | 1.000        | 2.439        | 3.360          | 152.7                                                             |
| C6             |           | H5  | O17 | 0.951 | 2.506        | 3.442        | 168.0          | -1/2+x,y,1.5-z; 1/2+x,y,1.5-z                                     |
| C11            |           | H9  | O5  | 1.001 | 2.367        | 3.185        | 138.4          | 1+x,y,z; -1+x,y,z                                                 |
| C8             |           | H6  | O7  | 1.000 | 2.395        | 3.308        | 151.4          | -1/2+x,1/2-y,1-z; 1/2+x,1/2-y,1-z                                 |
| C4             |           | H4  | O13 | 0.949 | 2.422        | 3.319        | 157.6          | 2.5-x,-1/2+y,z; 2.5-x,1/2+y,z                                     |
| C1             |           | H1B | O15 | 0.981 | 2.595        | 3.268        | 125.9          | x, y, z                                                           |
| CL-20/BTF      | C6        | H6  | N18 | 0.980 | 2.448        | 3.338        | 150.7          | -x,-1/2+y,-1/2-z; -x,1/2+y,-1/2-z                                 |

## S2. Geometries of O··O contacts in BTF and BTF-based EECCs.

**Table s2.** Summary of intermolecular O··O interactions operating in the crystal structures of BTF and BTF-based cocrystals regarding a BTF molecule involved in crystal. The O··O distances are limited to shorter than 3.3 Å.

| Energetic-energetic | Atom1 | Atom2 | Length, Å                           | Symmetry Operation                        |
|---------------------|-------|-------|-------------------------------------|-------------------------------------------|
| BTF                 | O4    | O5    | 2.954                               | $1/2+x, 1/2-y, z ; -1/2+x, 1/2-y, z$      |
|                     | O1    | O5    | 3.046                               | $x, y, 1+z; x, y, -1+z$                   |
|                     | O2    | O3    | 3.070                               | $2-x, -y, 1/2+z; 2-x, -y, -1/2+z$         |
|                     | O1    | O4    | 3.088                               | $-1+x, y, 1+z; 1+x, y, -1+z$              |
|                     | O1    | O3    | 3.197                               | $-1+x, y, z; 1+x, y, z$                   |
|                     | O4    | O6    | 3.245                               | $1+x, y, -1+z; -1+x, y, 1+z$              |
|                     | O2    | O4    | 3.245                               | $x, y, 1+z; -x, y, 1+z$                   |
| BTF/CL-20           | O1    | O15   | 3.062                               | $1/2+x, 1/2-y, -z; -1/2+x, 1/2-y, -z$     |
|                     | O3    | O16   | 3.139                               | $1/2+x, 1.5-y, -z; -1/2+x, 1.5-y, -z$     |
|                     | O3    | O18   | 3.272                               | $1+x, y, z; -1+x, y, z$                   |
|                     | O4    | O13   | 3.271                               | $1/2+x, 1.5-y, -z; -1/2+x, 1.5-y, -z$     |
|                     | O4    | O15   | 3.028                               | $x, y, z$                                 |
|                     | O6    | O13   | 3.270                               | $x, -1+y, z; x, 1+y, z$                   |
|                     | O7    | O15   | 3.224                               | $1/2+x, 1/2-y, -z; -1/2+x, 1/2-y, -z$     |
|                     | O8    | O17   | 2.803                               | $-x, -1/2+y, -1/2-z; -x, 1/2+y, -1/2-z$   |
|                     | O8    | O13   | 3.172                               | $x, -1+y, z; x, 1+y, z$                   |
|                     | O9    | O13   | 2.962                               | $1-x, -1/2+y, -1/2-z; 1-x, 1/2+y, -1/2-z$ |
|                     | O10   | O17   | 3.192                               | $-x, -1/2+y, -1/2-z; -x, 1/2+y, -1/2-z$   |
|                     | O12   | O14   | 3.028                               | $-x, -1/2+y, -1/2-z; -x, 1/2+y, -1/2-z$   |
|                     | O12   | O18   | 3.176                               | $x, y, z$                                 |
|                     | O5    | O15   | 2.998                               | $x, y, z$                                 |
|                     | O5    | O17   | 3.167                               | $-1/2+x, y, 1.5-z; 1/2+x, y, 1.5-z$       |
|                     | O5    | O18   | 2.942                               | $-1/2+x, y, 1.5-z; 1/2+x, y, 1.5-z$       |
|                     | O6    | O10   | 3.036                               | $-1+x, y, z; 1+x, y, z$                   |
| O6                  | O12   | 3.185 | $1.5-x, -1/2+y, z; 1.5-x, 1/2+y, z$ |                                           |
| BTF/MATNB           | O1    | O2    | 2.945                               | $1-x, 2-y, 1-z (2)$                       |
|                     | O1    | O10   | 3.144                               | $1+x, 1+y, z; -1+x, -1+y, z$              |
|                     | O2    | O10   | 3.170                               | $1+x, 1+y, z; -1+x, -1+y, z$              |
|                     | O3    | O6    | 2.992                               | $x, 1.5-y, -1/2+z; x, 1.5-y, 1/2+z$       |
|                     | O3    | O8    | 3.192                               | $x, 1+y, z; x, -1+y, z$                   |
|                     | O4    | O9    | 2.951                               | $x, 1+y, z; x, -1+y, z$                   |
|                     | O4    | O12   | 2.876                               | $-x, 1/2+y, 1/2-z; -x, -1/2+y, 1/2-z$     |
|                     | O5    | O7    | 2.777                               | $x, y, z$                                 |
|                     | O5    | O12   | 3.110                               | $-x, 1-y, 1-z (2)$                        |
|                     | O6    | O6    | 2.812                               | $1-x, 1-y, 1-z$                           |
|                     | O6    | O12   | 3.111                               | $-x, 1-y, 1-z (2)$                        |
| BTF/TNA             | O1    | O7    | 3.253                               | $1-x, -y, -z (2)$                         |
|                     | O1    | O12   | 2.833                               | $x, 1+y, z; x, -1+y, z$                   |

|          |     |      |       |                                          |
|----------|-----|------|-------|------------------------------------------|
|          | O2  | O12  | 3.259 | $-x, -y, -z (2)$                         |
|          | O3  | O9   | 3.181 | $-1+y, y, z; 1+y, y, z$                  |
|          | O4  | O9   | 3.110 | $-1+x, y, z; 1+x, y, z$                  |
|          | O5  | O11  | 3.205 | $x, y, z$                                |
|          | O6  | O10  | 2.990 | $x, y, z$                                |
| BTF/TNB  | O1  | O7   | 2.999 | $1+x, 1+y, z; -1+x, -1+y, z$             |
|          | O1  | O10  | 3.247 | $1-x, 1/2+y, 1/2-z; 1-x, -1/2+y, 1/2-z$  |
|          | O1  | O11  | 3.123 | $1-x, 1-y, -z; 1-x, 1-y, -z$             |
|          | O1  | O12  | 3.264 | $1-x, 1-y, -z; 1-x, 1-y, -z$             |
|          | O2  | O7   | 3.282 | $-x, 1-y, -z; -x, 1-y, -z$               |
|          | O4  | O10  | 3.101 | $x, y, z$                                |
|          | O5  | O12  | 3.15  | $1+x, 1/2-y, 1/2+z; -1+x, 1/2-y, -1/2+z$ |
|          | O6  | O9   | 3.07  | $1+x, y, z; -1+x, y, z$                  |
| BTF/TNAZ | O10 | O5A  | 3.284 | $x, 1+y, z; x, -1+y, z$                  |
|          | O11 | O5A  | 2.916 | $1+x, 1+y, z; -1+x, -1+y, z$             |
|          | O12 | O5A  | 3.265 | $1+x, 1+y, z; -1+x, -1+y, z$             |
| BTF/TNT  | O2  | O13A | 2.853 | $1+x, 1+y, z; -1+x, -1+y, z$             |
|          | O2  | O17  | 3.265 | $1-x, 1-y, 1-z; 1-x, 1-y, 1-z$           |
|          | O3  | O15  | 3.001 | $1+x, y, z; -1+x, y, z$                  |
|          | O4  | O14  | 3.19  | $-1+x, y, z; 1+x, y, z$                  |
|          | O5  | O16  | 3.112 | $x, y, z$                                |
|          | O6  | O16  | 3.154 | $x, y, z$                                |
|          | O7  | O18  | 3.258 | $-x, 1-y, 1-z; -x, 1-y, 1-z$             |
|          | O8  | O21  | 3.112 | $1+x, y, z; -1+x, y, z$                  |
|          | O11 | O15  | 3.272 | $x, 1+y, z; x, -1+y, z$                  |
|          | O11 | O16  | 3.287 | $x, 1+y, z; x, -1+y, z$                  |
|          | O11 | O24  | 3.090 | $x, 1+y, z; x, -1+y, z$                  |
|          | O12 | O22  | 2.982 | $x, y, z$                                |
| BTF/DNB  | O2  | O7   | 3.236 | $-1+x, 1.5-y, -1/2+z; 1+x, 1.5-y, 1/2+z$ |
|          | O2  | O11  | 3.275 | $x, y, z$                                |
|          | O3  | O11  | 3.180 | $x, y, z$                                |

### S3. Summary of synthesis conditions of observed EECCs

Table s3. Synthesis conditions of **observed** EECCs

| Cocrystals  | Temperature (°C) | Solvent      |
|-------------|------------------|--------------|
| CL-20/HMX   | 23               | 2-propanol   |
| CL-20/TNT   | 23               | ethanol      |
| CL-20/BTF   | room temperature | ethanol      |
| TNT/TNB     | room temperature | ethanol      |
| BTF/TNA     | room temperature | acetone      |
| BTF/TNB     | room temperature | acetone      |
| BTF/MATNB   | room temperature | acetone      |
| BTF/TNAZ    | room temperature | acetone      |
| BTF/TNT     | room temperature | acetone      |
| BTF/DNB     | room temperature | ethanol      |
| DADP/TCTNB  | room temperature | acetonitrile |
| DADP/TBCTNB | room temperature | acetonitrile |
